# Supplementary material
Source: MDPI journal article supplement (https://www.mdpi.com/2071-1050/16/10/4205)
Supplement: s1 [file s1]

## Supplementary Materials - File S1: Questionnaire survey (Authors, 2019)

Dear Participant,

This questionnaire is designed to complete a study on evaluating the effects of Bazaar's Sustainable Design (in terms of human relationships with nature) on its Customer's Loyalty. We will appreciate if you allocate some of your time to fill in this questionnaire. Thank you in advance for your participation in this study.

It should be noted that you are completely randomly selected, and your profile will not be written in this questionnaire.

| Participant Information                                |                   |
|--------------------------------------------------------|-------------------|
| Age:                                                   | Purpose of visit: |
| Do you work in the Bazaar?                             |                   |
| Do you shop from the bazaar on daily basis?            |                   |
| Do you live in the Bazaar's surrounding neighborhoods? |                   |

| How much does the Integration in the Bazaar's design affect Customer Loyalty?                                                        | Very Low | Low | Medium | High | Very High |
|--------------------------------------------------------------------------------------------------------------------------------------|----------|-----|--------|------|-----------|
| 1- How much does the design integration of the Bazaar affect your overall satisfaction of the Bazaar?                                |          |     |        |      |           |
| 2- How much does the design integration of the Bazaar affect your brand awareness in the Bazaar?                                     |          |     |        |      |           |
| 3- How much does the design integration of the Bazaar affect your likelihood to increase the frequency of purchases from the Bazaar? |          |     |        |      |           |
| 4- How much does the design integration of the Bazaar affect your likelihood to purchase more from the Bazaar?                       |          |     |        |      |           |
| 5- How much does the design integration of the Bazaar affect your likelihood to recommend the Bazaar?                                |          |     |        |      |           |
| 6- How much does the design integration of the Bazaar affect your Trust in the Bazaar?                                               |          |     |        |      |           |
| How much does the Responsiveness of the Bazaar's design affect Customer Loyalty?                                                     | Very Low | Low | Medium | High | Very High |
| 7- How much does the responsiveness of the Bazaar's design affect your overall satisfaction of the Bazaar?                           |          |     |        |      |           |

|                                                                                                                                                   |                 |            |               |             |                  |
|---------------------------------------------------------------------------------------------------------------------------------------------------|-----------------|------------|---------------|-------------|------------------|
| 8- How much does the responsiveness of the Bazaar's design affect your brand awareness in the Bazaar?                                             |                 |            |               |             |                  |
| 9- How much does the responsiveness of the Bazaar's design affect your likelihood to increase the frequency of purchases from the Bazaar?         |                 |            |               |             |                  |
| 10- How much does the responsiveness of the Bazaar's design affect your likelihood to purchase more from the Bazaar?                              |                 |            |               |             |                  |
| 11- How much does the responsiveness of the Bazaar's design affect your likelihood to recommend the Bazaar?                                       |                 |            |               |             |                  |
| 12- How much does the responsiveness of the Bazaar's design affect your Trust in the Bazaar?                                                      |                 |            |               |             |                  |
| <b>How much does the Optimized Consumption in the Bazaar's design affect Customer Loyalty?</b>                                                    | <b>Very Low</b> | <b>Low</b> | <b>Medium</b> | <b>High</b> | <b>Very High</b> |
| 13- How much does the optimized consumption in the Bazaar's design affect your overall satisfaction of the Bazaar?                                |                 |            |               |             |                  |
| 14- How much does the optimized consumption in the Bazaar's design affect your brand awareness in the Bazaar?                                     |                 |            |               |             |                  |
| 15- How much does the optimized consumption in the Bazaar's design affect your likelihood to increase the frequency of purchases from the Bazaar? |                 |            |               |             |                  |
| 16- How much does the optimized consumption in the Bazaar's design affect your likelihood to purchase more from the Bazaar?                       |                 |            |               |             |                  |
| 17- How much does the optimized consumption in the Bazaar's design                                                                                |                 |            |               |             |                  |

|                                                                                                                                            |                 |            |               |             |                  |
|--------------------------------------------------------------------------------------------------------------------------------------------|-----------------|------------|---------------|-------------|------------------|
| affect your likelihood to recommend the Bazaar?                                                                                            |                 |            |               |             |                  |
| 18- How much does the optimized consumption in the Bazaar's design affect your Trust in the Bazaar?                                        |                 |            |               |             |                  |
| <b>How much does the Visual Quality of the Bazaar's design affect Customer Loyalty?</b>                                                    | <b>Very Low</b> | <b>Low</b> | <b>Medium</b> | <b>High</b> | <b>Very High</b> |
| 19- How much does the visual quality of the Bazaar's design affect your overall satisfaction of the Bazaar?                                |                 |            |               |             |                  |
| 20- How much does the visual quality of the Bazaar's design affect your brand awareness in the Bazaar?                                     |                 |            |               |             |                  |
| 21- How much does the visual quality of the Bazaar's design affect your likelihood to increase the frequency of purchases from the Bazaar? |                 |            |               |             |                  |
| 22- How much does the visual quality of the Bazaar's design affect your likelihood to purchase more from the Bazaar?                       |                 |            |               |             |                  |
| 23- How much does the visual quality of the Bazaar's design affect your likelihood to recommend the Bazaar?                                |                 |            |               |             |                  |
| 24- How much does the visual quality of the Bazaar's design affect your Trust in the Bazaar?                                               |                 |            |               |             |                  |
| <b>How much does the Vitality and Flexibility of the Bazaar's design affect Customer Loyalty?</b>                                          | <b>Very Low</b> | <b>Low</b> | <b>Medium</b> | <b>High</b> | <b>Very High</b> |
| 25- How much does the vitality and flexibility of the Bazaar's design affect your overall satisfaction of the Bazaar?                      |                 |            |               |             |                  |
| 26- How much does the vitality and flexibility of the Bazaar's design affect your brand awareness in the Bazaar?                           |                 |            |               |             |                  |
| 27- How much does the vitality and flexibility of the Bazaar's design                                                                      |                 |            |               |             |                  |

|                                                                                                                                                      |                 |            |               |             |                  |
|------------------------------------------------------------------------------------------------------------------------------------------------------|-----------------|------------|---------------|-------------|------------------|
| affect your likelihood to increase the frequency of purchases from the Bazaar?                                                                       |                 |            |               |             |                  |
| 28- How much does the vitality and flexibility of the Bazaar's design affect your likelihood to purchase more from the Bazaar?                       |                 |            |               |             |                  |
| 29- How much does the vitality and flexibility of the Bazaar's design affect your likelihood to recommend the Bazaar?                                |                 |            |               |             |                  |
| 30- How much does the vitality and flexibility of the Bazaar's design affect your Trust in the Bazaar?                                               |                 |            |               |             |                  |
| <b>How much does the Knowledge and Innovation in the Bazaar's design affect Customer Loyalty?</b>                                                    | <b>Very Low</b> | <b>Low</b> | <b>Medium</b> | <b>High</b> | <b>Very High</b> |
| 31- How much does the knowledge and innovation in the Bazaar's design affect your overall satisfaction of the Bazaar?                                |                 |            |               |             |                  |
| 32- How much does the knowledge and innovation in the Bazaar's design affect your brand awareness in the Bazaar?                                     |                 |            |               |             |                  |
| 33- How much does the knowledge and innovation in the Bazaar's design affect your likelihood to increase the frequency of purchases from the Bazaar? |                 |            |               |             |                  |
| 34- How much does the knowledge and innovation in the Bazaar's design affect your likelihood to purchase more from the Bazaar?                       |                 |            |               |             |                  |
| 35- How much does the knowledge and innovation in the Bazaar's design affect your likelihood to recommend the Bazaar?                                |                 |            |               |             |                  |
| 36- How much does the knowledge and innovation in the Bazaar's design affect your Trust in the Bazaar?                                               |                 |            |               |             |                  |

| <b>How much does the Decarbonization strategies of the Bazaar's design affect Customer Loyalty?</b>                                                    | <b>Very Low</b> | <b>Low</b> | <b>Medium</b> | <b>High</b> | <b>Very High</b> |
|--------------------------------------------------------------------------------------------------------------------------------------------------------|-----------------|------------|---------------|-------------|------------------|
| 37- How much does the decarbonization strategies of the Bazaar's design affect your overall satisfaction of the Bazaar?                                |                 |            |               |             |                  |
| 38- How much does the decarbonization strategies of the Bazaar's design affect your brand awareness in the Bazaar?                                     |                 |            |               |             |                  |
| 39- How much does the decarbonization strategies of the Bazaar's design affect your likelihood to increase the frequency of purchases from the Bazaar? |                 |            |               |             |                  |
| 40- How much does the decarbonization strategies of the Bazaar's design affect your likelihood to purchase more from the Bazaar?                       |                 |            |               |             |                  |
| 41- How much does the decarbonization strategies of the Bazaar's design affect your likelihood to recommend the Bazaar?                                |                 |            |               |             |                  |
| 42- How much does the decarbonization strategies of the Bazaar's design affect your Trust in the Bazaar?                                               |                 |            |               |             |                  |
| <b>How much does the Equity in the Bazaar's design affect Customer Loyalty?</b>                                                                        | <b>Very Low</b> | <b>Low</b> | <b>Medium</b> | <b>High</b> | <b>Very High</b> |
| 43- How much does the equity in the Bazaar's design affect your overall satisfaction of the Bazaar?                                                    |                 |            |               |             |                  |
| 44- How much does the equity in the Bazaar's design affect your brand awareness in the Bazaar?                                                         |                 |            |               |             |                  |
| 45- How much does the equity in the Bazaar's design affect your                                                                                        |                 |            |               |             |                  |

|                                                                                                                                      |                 |            |               |             |                  |
|--------------------------------------------------------------------------------------------------------------------------------------|-----------------|------------|---------------|-------------|------------------|
| likelihood to increase the frequency of purchases from the Bazaar?                                                                   |                 |            |               |             |                  |
| 46- How much does the equity in the Bazaar's design affect your likelihood to purchase more from the Bazaar?                         |                 |            |               |             |                  |
| 47- How much does the equity in the Bazaar's design affect your likelihood to recommend the Bazaar?                                  |                 |            |               |             |                  |
| 48- How much does the equity in the Bazaar's design affect your Trust in the Bazaar?                                                 |                 |            |               |             |                  |
| <b>How much does the Locality of the Bazaar's design affect Customer Loyalty?</b>                                                    | <b>Very Low</b> | <b>Low</b> | <b>Medium</b> | <b>High</b> | <b>Very High</b> |
| 49- How much does the locality of the Bazaar's design affect your overall satisfaction of the Bazaar?                                |                 |            |               |             |                  |
| 50- How much does the locality of the Bazaar's design affect your brand awareness in the Bazaar?                                     |                 |            |               |             |                  |
| 51- How much does the locality of the Bazaar's design affect your likelihood to increase the frequency of purchases from the Bazaar? |                 |            |               |             |                  |
| 52- How much does the locality of the Bazaar's design affect your likelihood to purchase more from the Bazaar?                       |                 |            |               |             |                  |
| 53- How much does the locality of the Bazaar's design affect your likelihood to recommend the Bazaar?                                |                 |            |               |             |                  |
| 54- How much does the locality of the Bazaar's design affect your Trust in the Bazaar?                                               |                 |            |               |             |                  |
