# Supplementary material
Source: MDPI journal article supplement (https://www.mdpi.com/2071-1050/16/10/4205)
Supplement: s1 [file s1 › File S2 .pdf]

**Supplementary Materials - File S2: Reliability and Validity Test** (source: authors, 2019)

| Reliability and Validity Test; 2019 Questionnaire Survey |                                                 |                    |         |
|----------------------------------------------------------|-------------------------------------------------|--------------------|---------|
| Reliability Statistics                                   | Cronbach’s Alpha                                |                    | 0.902   |
| KMO and Bartlett’s Test                                  | Kaiser-Meyer-Olkin measure of sampling adequacy |                    | 0.865   |
|                                                          | Bartlett’s test of sphericity                   | Approx. chi-square | 147.039 |
|                                                          |                                                 | Sig.               | 0.000   |
| Reliability and Validity Test; 2021 Questionnaire Survey |                                                 |                    |         |
| Reliability Statistics                                   | Cronbach’s Alpha                                |                    | 0.847   |
| KMO and Bartlett’s Test                                  | Kaiser-Meyer-Olkin measure of sampling adequacy |                    | 0.731   |
|                                                          | Bartlett’s test of sphericity                   | Approx. chi-square | 148.162 |
|                                                          |                                                 | Sig.               | 0.001   |
| Reliability and Validity Test; 2023 Questionnaire Survey |                                                 |                    |         |
| Reliability Statistics                                   | Cronbach’s Alpha                                |                    | 0.963   |
| KMO and Bartlett’s Test                                  | Kaiser-Meyer-Olkin measure of sampling adequacy |                    | 0.869   |
|                                                          | Bartlett’s test of sphericity                   | Approx. chi-square | 154.230 |
|                                                          |                                                 | Sig.               | 0.000   |
